# Supplementary material for: Rutile to anatase phase transition induced by N doping in highly oriented TiO2 films
Source: Royal Society of Chemistry journal article supplement (doi:10.1039/c6cp04003a), 2016-01-01
Supplement: c6cp04003a1.pdf [file c6cp04003a1.pdf]

**Supporting information for:**

**Rutile to Anatase phase transition induced by N doping in highly oriented TiO<sub>2</sub> films**

Andrew Breeson<sup>1, 2</sup>, Gopinathan Sankar<sup>1</sup> Gregory Goh Kia Liang<sup>2</sup>, Robert G. Palgrave<sup>\*1</sup>

<sup>1</sup> Department of Chemistry, University College London, 20 Gordon Street, London, UK, WC1E 0AJ

<sup>2</sup> Institute of Materials Research and Engineering, 2 Fusionopolis Way, #08-03 Innovis, Singapore 138634

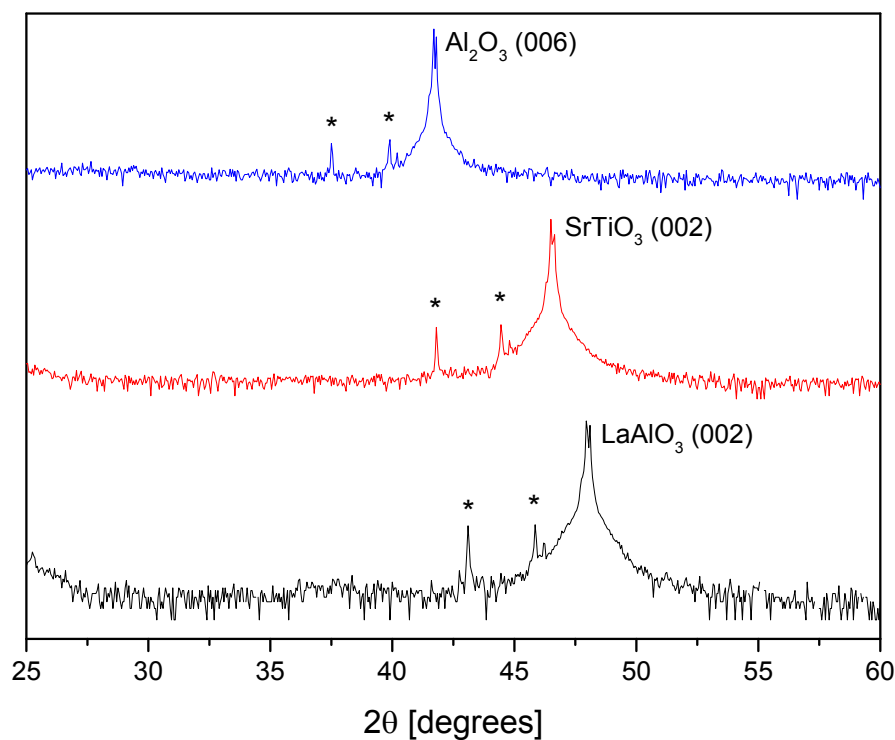

Figure S1. XRD patterns of uncoated substrates

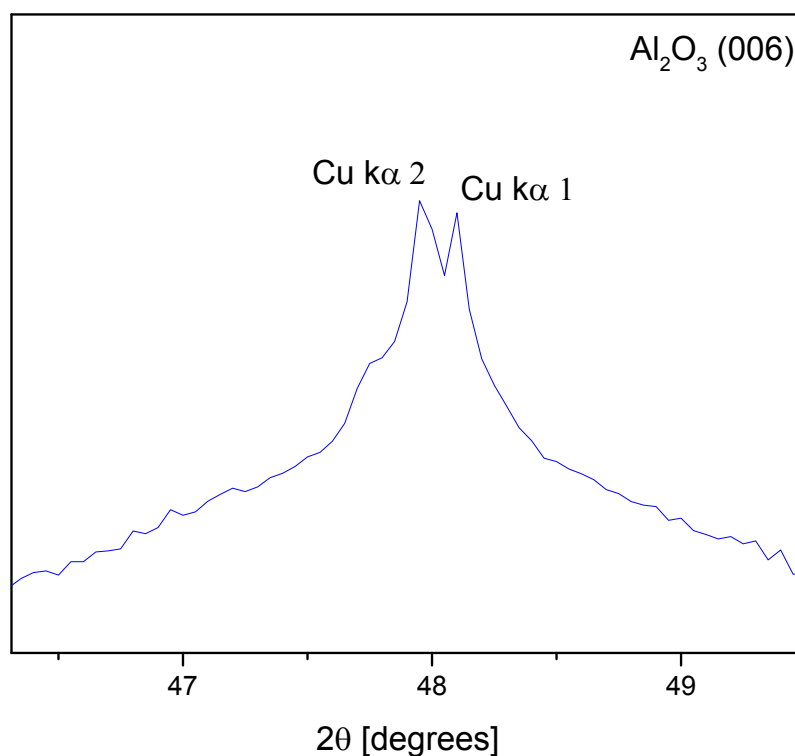

Figure S2. XRD of  $\text{Al}_2\text{O}_3$  (006) showing splitting due to  $K\alpha_1$  and  $K\alpha_2$  wavelengths

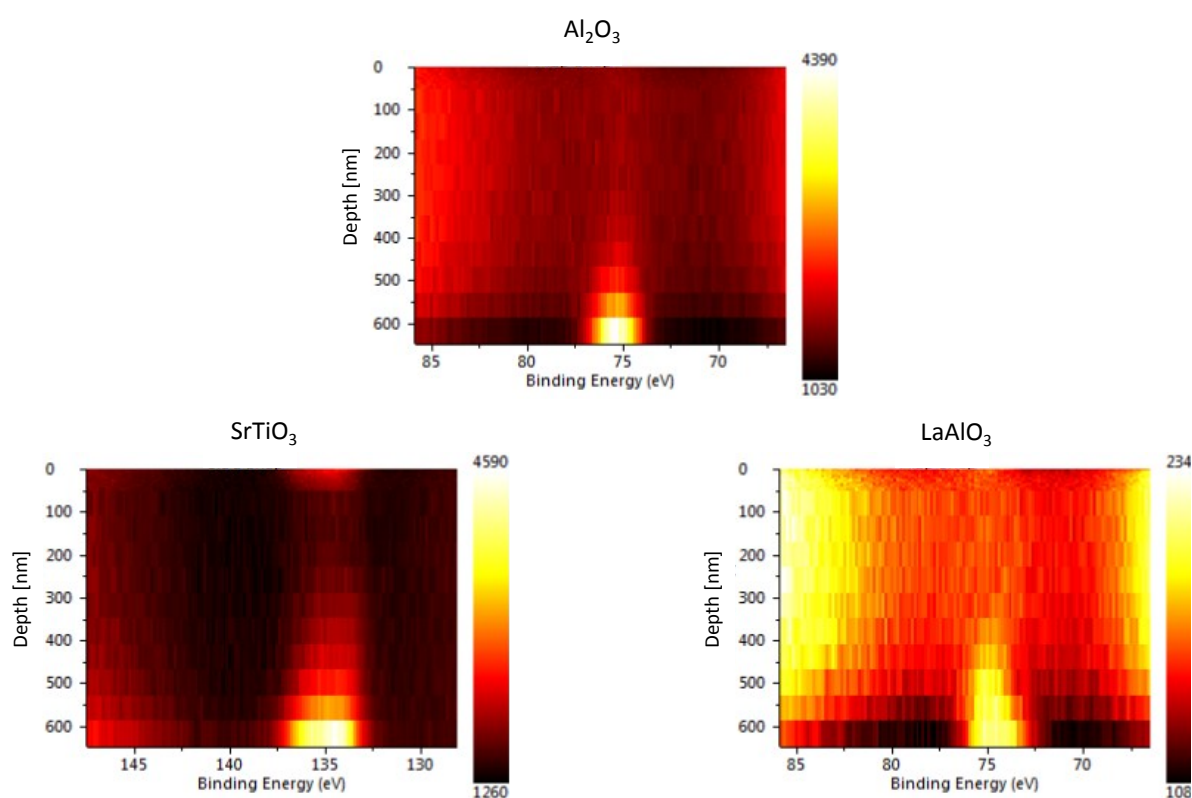

Figure S3. XPS depth profiles of  $\text{TiO}_2$  films on  $\text{Al}_2\text{O}_3$ ,  $\text{SrTiO}_3$ , and  $\text{LaAlO}_3$  displayed as a heat map. For films grown on  $\text{Al}_2\text{O}_3$  the Al 2p region is shown, for  $\text{SrTiO}_3$  the Sr 3d region is shown, and for  $\text{LaAlO}_3$  the Al 2p region is shown. These regions are used to identify the depth of the film-substrate interface and hence the thickness of the films.

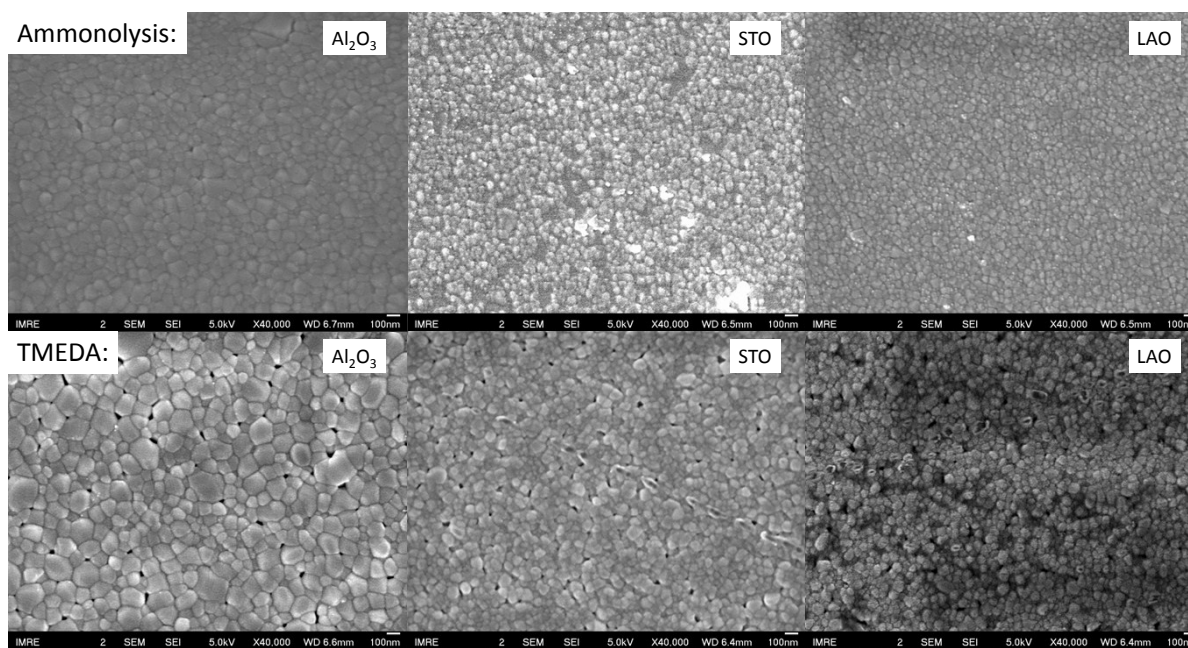

Figure S4. SEM images of nitrogen doped TiO<sub>2</sub> films (ammonolysis top, TMEDA bottom)
